# Supplementary material for: Outcomes Among Mechanically Ventilated Patients With Severe Pneumonia and Acute Hypoxemic Respiratory Failure From SARS-CoV-2 and Other Etiologies
Source: PubMed Central journal article supplement (PMC9856712; doi:10.1001/jamanetworkopen.2022.50401), 2023-01-10
Supplement: jamanetwopen-e2250401-s002.pdf [file jamanetwopen-e2250401-s002.pdf]

## Data Sharing Statement

Nolley. Outcomes Among Mechanically Ventilated Patients With Severe Pneumonia and Acute Hypoxemic Respiratory Failure From SARS-CoV-2 and Other Etiologies. *JAMA Netw Open*. Published January 10, 2023. doi:10.1001/jamanetworkopen.2022.50401

### Data

**Data available:** Yes

**Data types:** Deidentified participant data, Data dictionary

**How to access data:** Data will be made available upon reasonable request to the corresponding author. Please email [wcheck1@jhmi.edu](mailto:wcheck1@jhmi.edu) for questions.

**When available:** With publication

### Supporting Documents

**Document types:** Statistical/analytic code

**How to access documents:** Statistical code is available in the Online Supplement.

**When available:** With publication

### Additional Information

**Who can access the data:** Researchers whose proposed use of the data has been approved.

**Types of analyses:** Data will be made available for the purposes of replication.

**Mechanisms of data availability:** Data will be made available after approval of a proposal and a signed data access agreement.
